# Supplementary material
Source: Springer Nature journal article supplement (https://www.springermedizin.de/resource/supplementary/12885_2013_4227_MOESM1_ESM.pdf/9465848)

**a**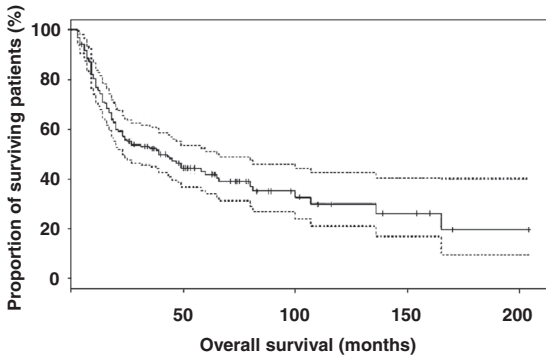**b**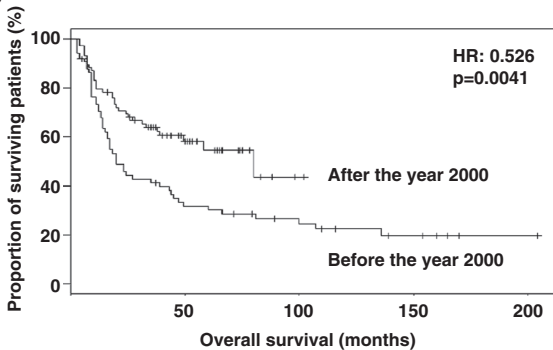

Supplement: MOESM1 [file 9465848]
